# Supplementary material
Source: PubMed Central journal article supplement (PMC1896274)
Supplement: bj4040499add.pdf [file bj4040499add.pdf]

**Supplementary Table 1**

| <b>Genes</b>        | <b>Accession no.</b> | <b>Forward/reverse primers</b>                               |
|---------------------|----------------------|--------------------------------------------------------------|
| <b>β-actin</b>      | NM_007393            | 5'-ATGAAGTGTGACGTTGACATCCGT<br>5'-CCTAGAAGCACTTGCGGTGCACGATG |
| <b>PGC-1α</b>       | NM_008904            | 5'-ATACCGCAAAGAGCACGAGAAG<br>5'-CTCAAGAGCAGCGAAAGCGTCACAG    |
| <b>Myc</b>          | NM_010849            | 5'-CGAGCTGAAGCGTAGCTTTT<br>5'-CTCGCCGTTTCCTCAGTAAG           |
| <b>mtTFA</b>        | BC083084             | 5'-GCTGATGGGTATGGAGAAG<br>5'-GAGCCGAATCATCCTTTGC             |
| <b>Cyt. C</b>       | NM_007808            | 5'-CCAAATCTCCACGGTCTGTTC<br>5'-ATCAGGGTATCCTCTCCCCAG         |
| <b>COX IV</b>       | X54691               | 5'-TGGGAGTGTTGTGAAGAGTGA<br>5'-GCAGTGAAGCCGATGAAGAAC         |
| <b>COX I</b>        | J01420               | 5'-CACTAATAATCGGAGCCCCA<br>5'-TTCATCCTGTTCTGCTCCT            |
| <b>ATPase-F1-α1</b> | BC055892             | 5'-TCTCCATGCCTCTAACACTCG<br>5'-CCAGGTCAACAGACGTGTCAG         |
| <b>UCP2</b>         | U69135               | 5'-GGCCTCTGGAAAGGGACTTC<br>5'-ACCAGCTCAGCACAGTTGACA          |
